# Supplementary material for: Chiroptical sensing of homocysteine
Source: Royal Society of Chemistry journal article supplement (doi:10.1039/d0ob01798a), 2020-01-01
Supplement: d0ob01798a1.pdf [file d0ob01798a1.pdf]

## Supporting Information

### **Chiroptical Sensing of Homocysteine**

F. Yushra Thanzeel, Lily S. Zandi and Christian Wolf\*

Department of Chemistry, Georgetown University, Washington, DC 20057, USA  
cw27@georgetown.edu

#### Contents:

|                                                                                         |     |
|-----------------------------------------------------------------------------------------|-----|
| 1. General information                                                                  | S2  |
| 2. Probe comparison                                                                     | S2  |
| 3. Optimization studies                                                                 | S3  |
| 3.1. Base screening                                                                     | S3  |
| 3.2. Base equivalents                                                                   | S5  |
| 3.3. Solvent screening                                                                  | S5  |
| 4. Mechanistic studies                                                                  | S6  |
| 4.1. Selectivity experiments                                                            | S6  |
| 4.2. Kinetic study & CD signal stability                                                | S8  |
| 4.3. MS analysis                                                                        | S10 |
| 4.4. UV analysis                                                                        | S12 |
| 5. Quantification of enantiomeric excess of homocysteine<br>in the presence of cysteine | S14 |

## 1. General information

All purchased reagents were used without further purification. 2,3-Naphthalenedialdehyde was purchased from TCI America (purity  $\geq 99\%$ ). Phthalaldehyde (purity 98%) was purchased from Ark Pharm, Inc. L-Homocysteine (purity  $\geq 95\%$ ,  $[\alpha]_{\text{D}}^{25} = +25$  to  $+29^\circ$ ,  $c = 1$  in 1 M HCl) and L-cysteine (purity  $\geq 99\%$ ,  $[\alpha]_{\text{D}}^{20} = +8.3$  to  $+9.5^\circ$ ,  $c = 8$  in 1 M HCl) were purchased from Chem-Impex Int'l Inc. D/L-Homocysteine (purity  $\geq 95\%$ ), L-serine (purity 99%,  $[\alpha]_{\text{D}}^{20} = +13.7^\circ$ ,  $c = 10$  in 1 M HCl) and L-methionine (purity  $\geq 98\%$ ,  $[\alpha]_{\text{D}}^{20} = +23.40$ ,  $c = 5$  in 6 M HCl) were purchased from Sigma Aldrich. D-Cysteine (purity 98%,  $[\alpha]_{\text{D}}^{20} = -7.9^\circ$ ,  $c = 5$  in 5 M HCl) and L-Glutathione (purity 98%,  $[\alpha]_{\text{D}}^{20} = -13.5^\circ$ ,  $c = 2$  in  $\text{H}_2\text{O}$ ) were purchased from Combi Blocks Inc. L-Alanine (purity  $\geq 99\%$ ,  $[\alpha]_{\text{D}}^{25} = -14.5^\circ \pm 1.5^\circ$ ,  $c = 10$  in 6 M HCl) and L-Tyrosine (purity  $\geq 99\%$ ,  $[\alpha]_{\text{D}}^{25} = -10.0^\circ \pm -1.5^\circ$ ,  $c = 5$  in 1 M HCl) were purchased from Novabiochem. L-Cystine (purity 98%,  $[\alpha]_{\text{D}}^{20} = -222.5^\circ$  ( $c = 1$  in 1 M HCl)) was purchased from TCI America.

Sensing reactions were performed with probes **1** and **4** as described below. The CD spectra were collected with a standard sensitivity of 100 mdeg, a data pitch of 0.5 nm, a bandwidth of 1 nm, in a continuous scanning mode with a scanning speed of 500 nm/min and a response of 1 s, using a quartz cuvette (1 cm path length). The data were baseline corrected and smoothed using a binomial equation. UV spectra were collected with an average scanning time of 0.0125 s, a data interval of 5.00 nm and a scan rate of 400 nm/s. TRIZMA buffer (250.0 mM) was prepared using TRIZMA HCl and TRIZMA base in distilled water. The pH was adjusted using 5 M HCl. Potassium phosphate buffer (250.0 mM) was prepared using  $\text{K}_2\text{HPO}_4$  and  $\text{KH}_2\text{PO}_4$  in distilled water. The pH was adjusted to 8.0 using 5 M HCl and 5 M NaOH. Sodium borate buffer (250.0 mM) was prepared using boric acid and NaOH in distilled water. The pH was adjusted to 8.5 using 5 M HCl and 5 M NaOH. Carbonate-bicarbonate buffer (250.0 mM) was prepared using  $\text{NaHCO}_3$  and  $\text{Na}_2\text{CO}_3$  in distilled water. The pH was adjusted to 10.0 using 5 M HCl and 5 M NaOH.

Figure 1. Structures of probes used in the study.

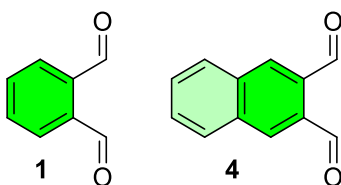

## 2. Probe comparison

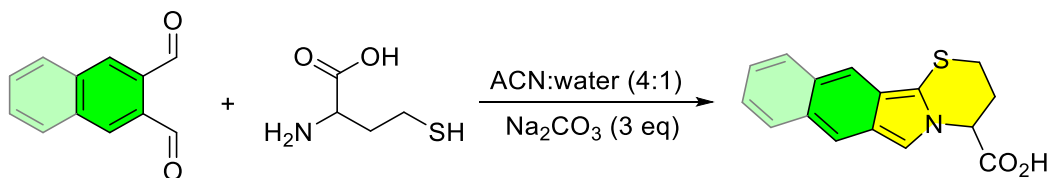

Scheme 1. Reaction of probe **1** and **4** with homocysteine.

To a solution of **1** (25.0 mM in acetonitrile, 440.0  $\mu$ L) was added L-homocysteine (25.0 mM aqueous solution containing 3 equivalents of  $\text{Na}_2\text{CO}_3$ , 400.0  $\mu$ L) and the mixture was diluted to 2.0 mL with acetonitrile. The reaction mixture was stirred for 2 hours. CD analysis was performed after diluting 300.0  $\mu$ L aliquots with 2.0 mL of acetonitrile. This procedure was repeated with probe **4** and CD analysis was performed after diluting 70.0  $\mu$ L aliquot with 2.0 mL of acetonitrile.

Figure 2. CD spectra of the reaction between probe **1** or **4** with L-homocysteine.

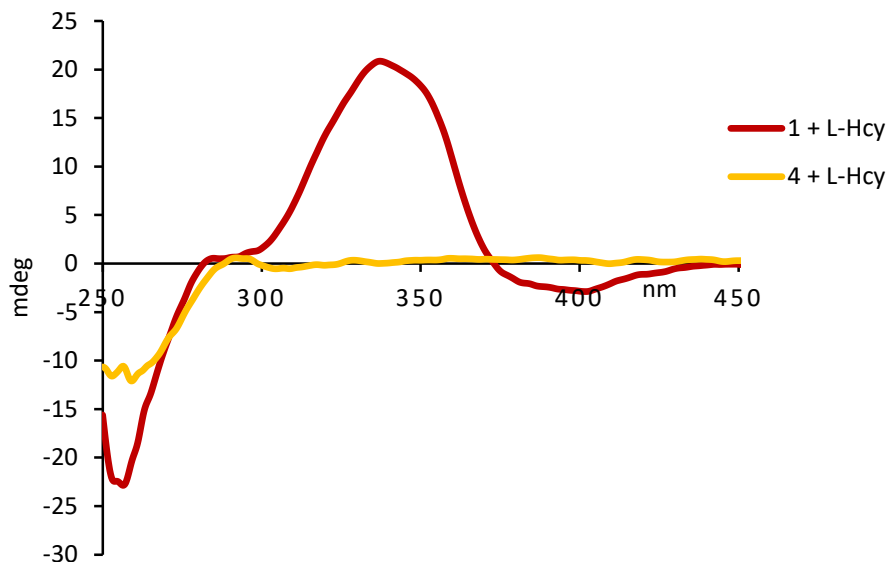

CD measurements were taken at 0.74 mM with probe **1** and at 0.17 mM with probe **4**.

### 3. Optimization studies

#### 3.1. Base screening

To a solution of **1** (25.0 mM in acetonitrile, 440.0  $\mu$ L) was added L-homocysteine (25.0 mM aqueous solution containing 2 equivalents of  $\text{Na}_2\text{CO}_3$ , 400.0  $\mu$ L) and the mixture was diluted to 2.0 mL with acetonitrile. The reaction mixture was stirred for 2 hours. The above procedure was repeated with  $\text{K}_2\text{CO}_3$ , NaOH, KOH,  $\text{Cs}_2\text{CO}_3$ , DBU, DABCO and with several buffer systems: TRIZMA (pH 8.0, 8.5 and 9.0, 250.0 mM), potassium phosphate (pH 8.0, 250.0 mM), sodium borate buffer (pH 8.5, 250.0 mM) and  $\text{NaHCO}_3/\text{Na}_2\text{CO}_3$  (pH 10.0, 250.0 mM). The highest CD intensities above 300 nm were observed in the presence of  $\text{K}_2\text{CO}_3$  and  $\text{Na}_2\text{CO}_3$ .

Figure 3. CD spectra of probe **1** upon binding of L-homocysteine in the presence of different bases. CD measurements were taken by diluting 300.0  $\mu\text{L}$  aliquots with 2.0 mL of acetonitrile.

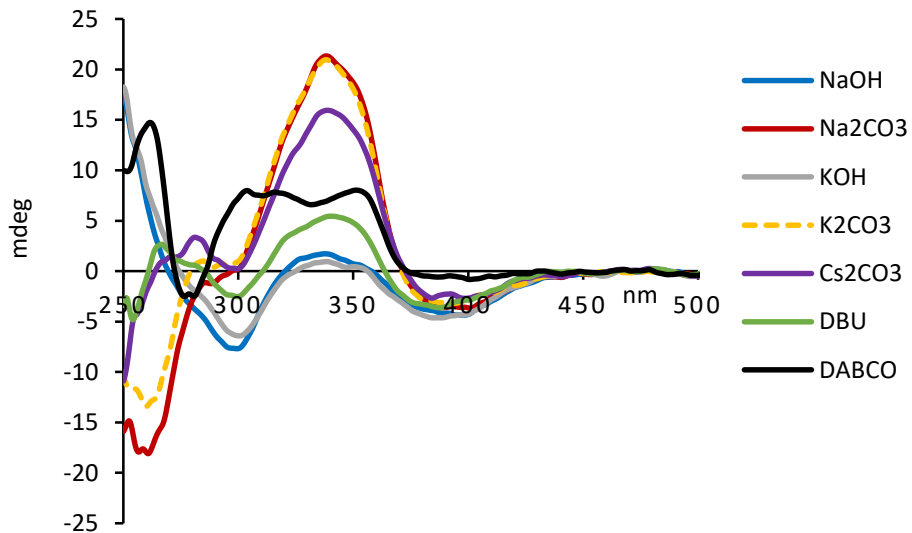

CD measurements were taken at 0.74 mM.

Figure 4. CD spectra of probe **1** upon binding of L-homocysteine using different buffers. CD measurements were taken by diluting 280.0  $\mu\text{L}$  aliquots with 2.0 mL of acetonitrile.

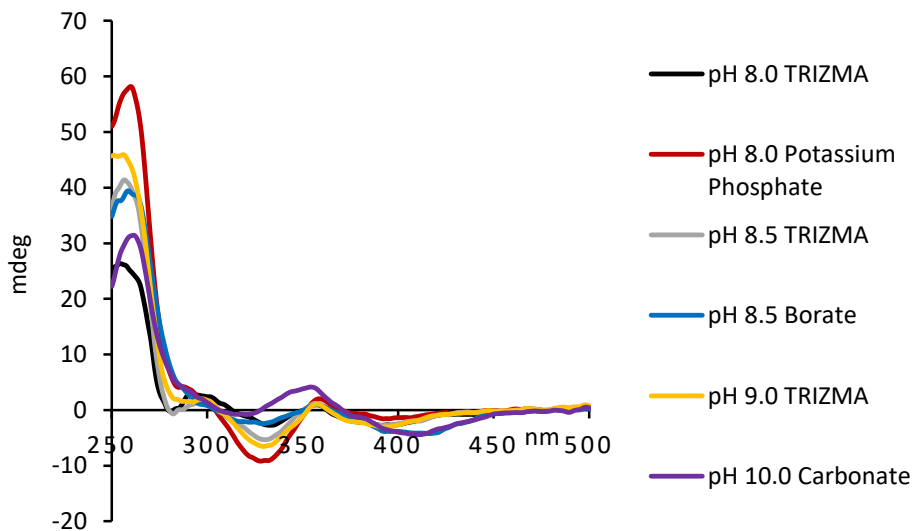

CD measurements were taken at 0.61 mM.

### 3.2. Base equivalents

To a solution of **1** (25.0 mM in acetonitrile, 440.0  $\mu\text{L}$ ) was added L-homocysteine (25.0 mM aqueous solution containing 1 equivalent of  $\text{Na}_2\text{CO}_3$ , 400.0  $\mu\text{L}$ ) and the mixture was diluted to 2.0 mL with acetonitrile. The reaction mixture was stirred for 2 hours. The above procedure was repeated with 2 and 3 equivalents  $\text{Na}_2\text{CO}_3$ . The amount of base in the reaction mixture had no effect on the CD signal. CD measurements were taken by diluting 300.0  $\mu\text{L}$  aliquots with 2.0 mL of acetonitrile

Figure 5. CD spectra of probe **1** with L-homocysteine with different equivalents of  $\text{Na}_2\text{CO}_3$  base.

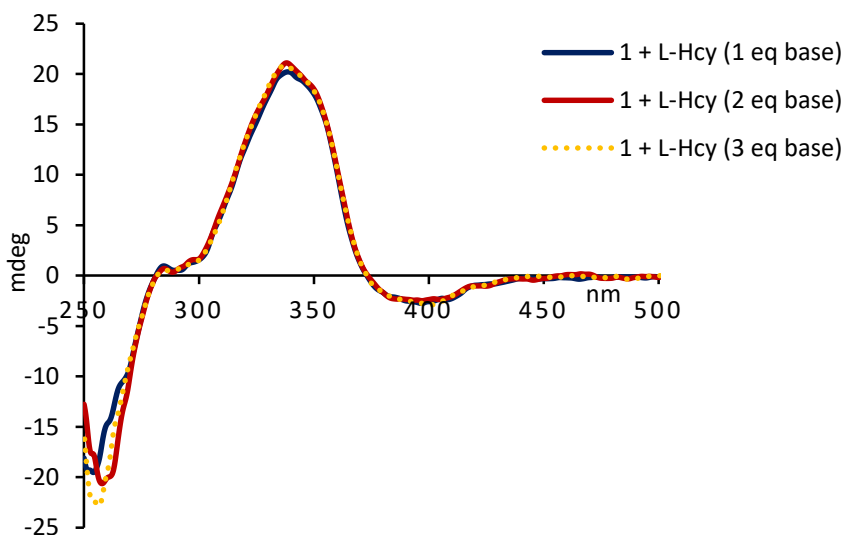

CD measurements were taken at 0.74 mM.

### 3.3. Solvent screening

To a solution of **1** (25.0 mM in acetonitrile, 440.0  $\mu\text{L}$ ) was added L-homocysteine (25.0 mM aqueous solution containing 2 equivalents of  $\text{K}_2\text{CO}_3$ , 400.0  $\mu\text{L}$ ) and the mixture was diluted to 2.0 mL with acetonitrile and water to obtain different ratios of water: acetonitrile (A:W). The reaction mixture was stirred for 2 hours. The highest CD intensities were observed when the acetonitrile: water ratio is between 2:1 and 4:1. CD measurements were taken by diluting 120.0  $\mu\text{L}$  aliquots with 2.0 mL of acetonitrile.

Figure 6. CD spectra of probe **1** upon binding of L-homocysteine under different ratios of acetonitrile: water (A:W).

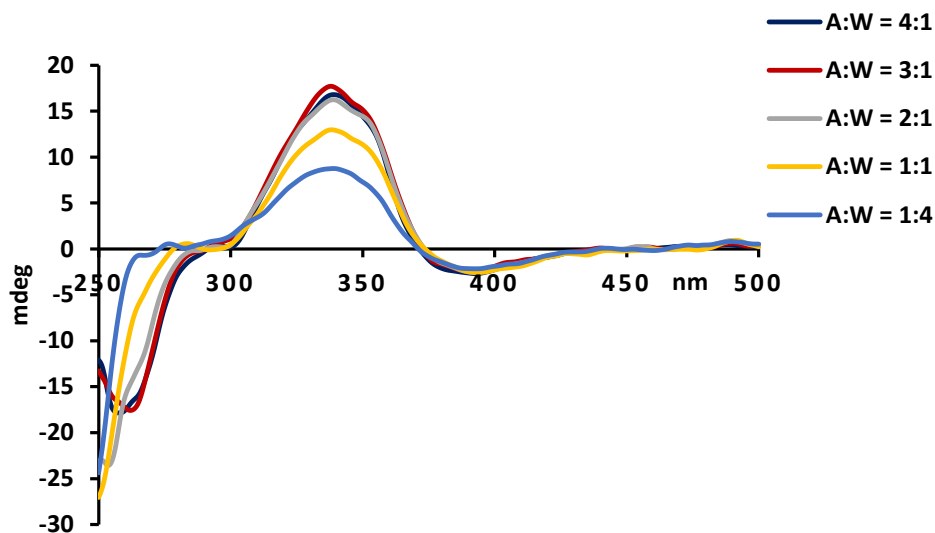

CD measurements were taken at 0.28 mM.

## 4. Mechanistic studies

### 4.1. Selectivity experiments

To a solution of **1** (25.0 mM in acetonitrile, 440.0  $\mu$ L) was added L-homocysteine (25.0 mM aqueous solution containing 2 equivalents of  $K_2CO_3$ , 400.0  $\mu$ L) and the mixture was diluted to 2.0 mL with acetonitrile. The reaction mixture was stirred for 2 hours. This procedure was repeated with L-cysteine, L-alanine, L-serine, L-tyrosine, L-glutathione, L-methionine and L-cystine. Three equivalents of  $K_2CO_3$  were used to ensure the L-cystine stock solution was homogeneous. CD measurements were taken by diluting 120.0  $\mu$ L aliquots with 2.0 mL of acetonitrile. The CD responses (Figure 7) and color of the reaction solutions after 2 hours (Figure 9) are shown below.

Figure 7. CD spectra of **1** in the presence of other amino acids and biothiols.

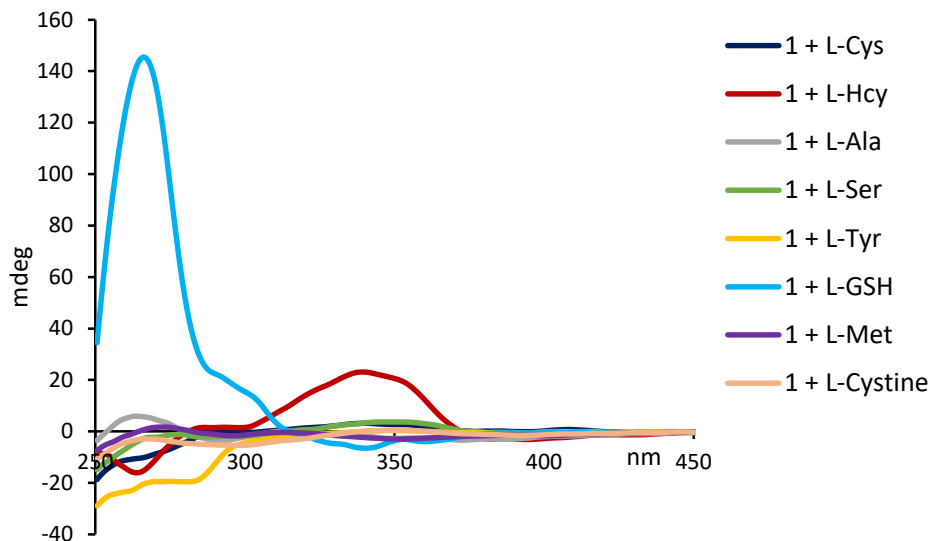

CD measurements were taken at 0.28 mM.

Figure 8. CD responses of probe **1** at 334 nm with other competing analytes.

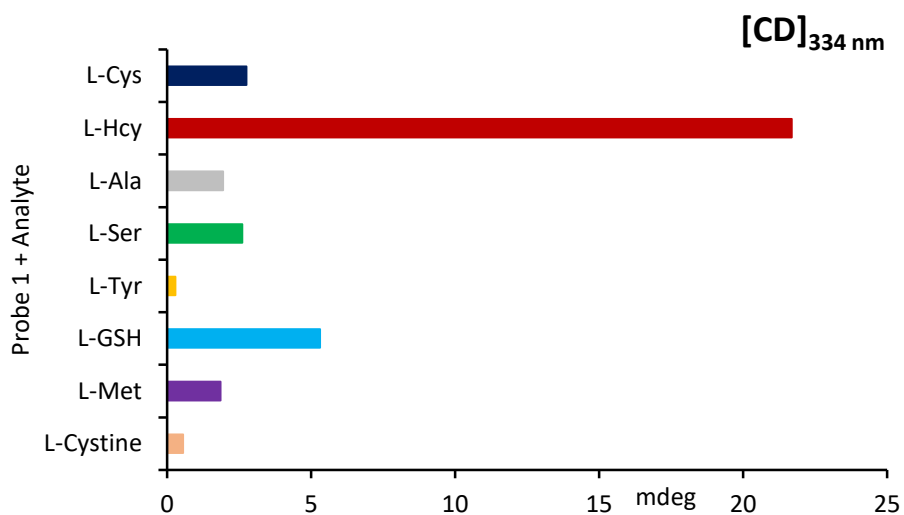

Figure 9. Naked eye detection using probe 1.

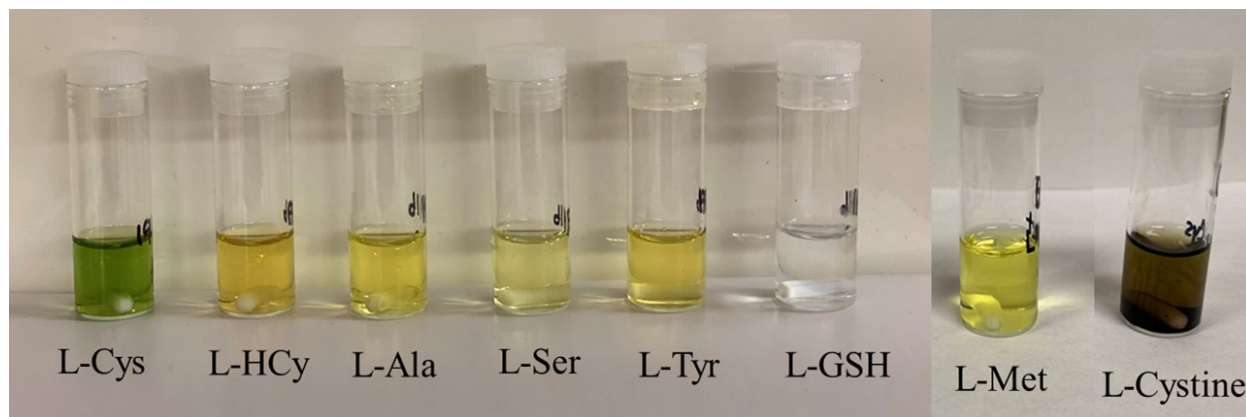

#### 4.2. Kinetic study & CD signal stability

The capture of L-homocysteine in water by probe 1 in the presence of  $K_2CO_3$  was studied using CD spectroscopy. To a solution of 1 (25.0 mM in acetonitrile, 440.0  $\mu$ L) was added L-homocysteine (25.0 mM aqueous solution containing 2 equivalents of  $K_2CO_3$ , 400.0  $\mu$ L) and the mixture was diluted to 2.0 mL with acetonitrile. CD measurements were taken by diluting 120.0  $\mu$ L aliquots with 2.0 mL of acetonitrile. The reaction was complete in 15 minutes and the CD signal was stable for at least 2 hours.

Figure 10. CD spectra at different time intervals.

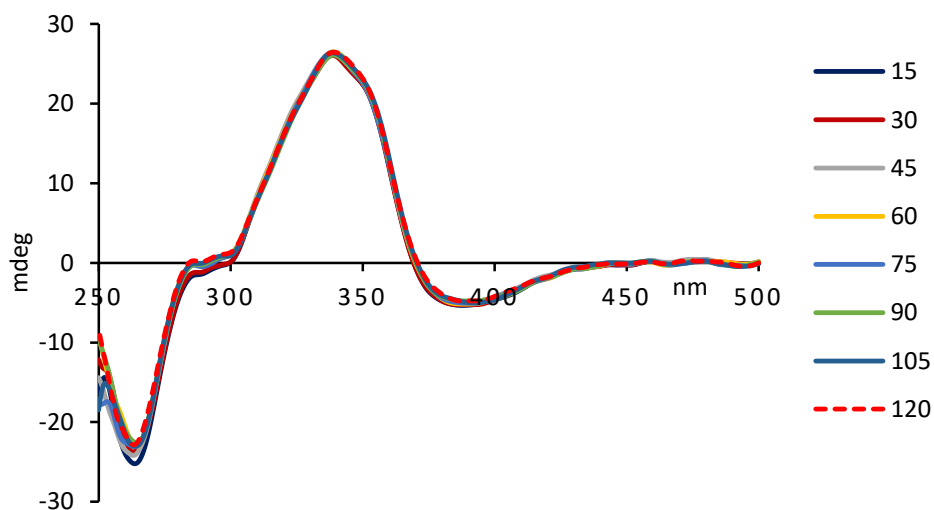



Figure 11. CD intensity at 334 nm at different time intervals.

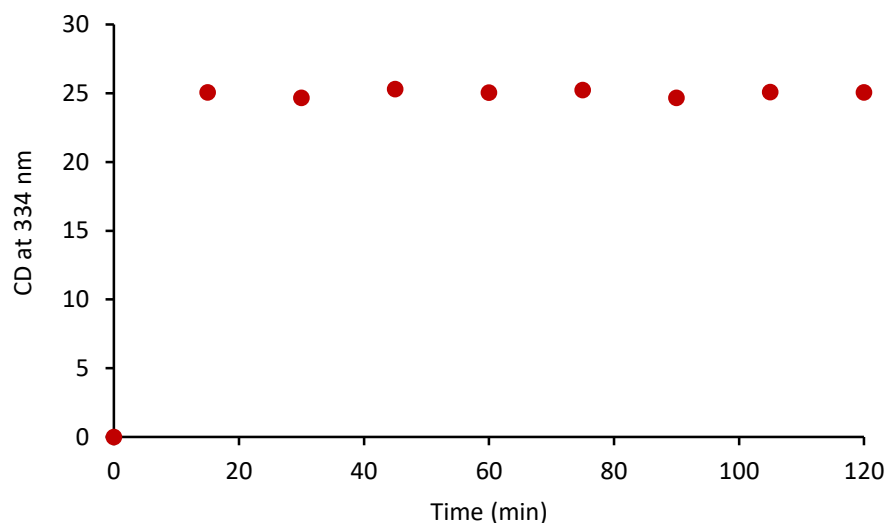

To a solution of probe **1** (25.0 mM in acetonitrile, 880.0  $\mu\text{L}$ ) was added L-cysteine (50.0 mM aqueous solution containing 2 equivalents of  $\text{K}_2\text{CO}_3$ , 200.0  $\mu\text{L}$ ) and the mixture was diluted with water (200.0  $\mu\text{L}$ ) and acetonitrile (720.0  $\mu\text{L}$ ). After 2 hours, CD measurements were taken by diluting 240.0  $\mu\text{L}$  aliquots with 2.0 mL of acetonitrile. The above procedure was repeated with D-cysteine. The results show that the formation of a CD active species with cysteine is considerably slower compared to homocysteine.

Figure 12. CD sensing of cysteine enantiomers with **1** after 2 hours.

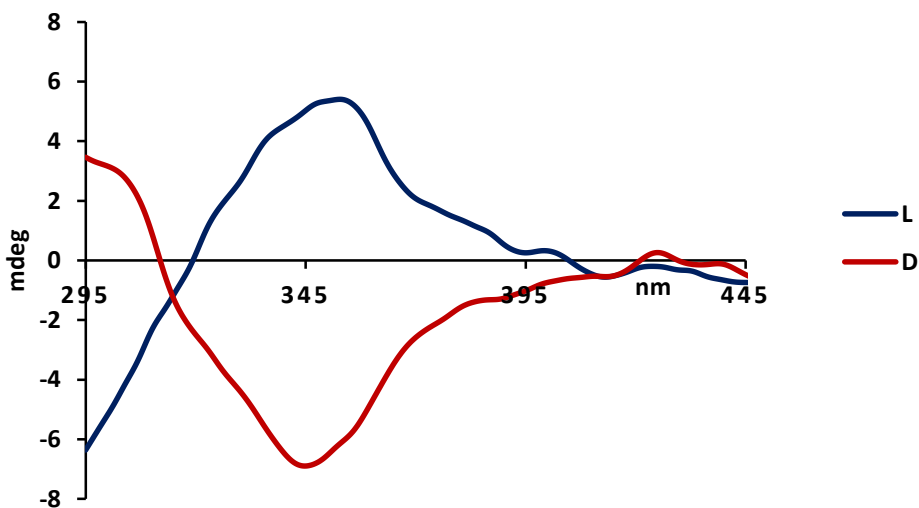

### 4.3. MS analysis

The reaction of L-homocysteine and probe **1** was studied using ESI-MS spectroscopy. To a solution of **1** (25.0 mM in acetonitrile, 440.0  $\mu\text{L}$ ) was added L-homocysteine (25.0 mM aqueous solution containing 2 equivalents of NaOH, 400.0  $\mu\text{L}$ ) and the mixture was diluted to 2.0 mL with acetonitrile. After 2 hours, the reaction mixture was acidified with formic acid (1.0 M, 20.0  $\mu\text{L}$ ) and diluted to 4.0 mL using acetonitrile:water (1:1). A 10.0  $\mu\text{L}$  aliquot of this mixture was diluted with 2.0 mL of water for ESI-MS analysis and infused at a flow rate of 0.1 mL/min using a syringe pump. The voltages of the capillary and needle were set at 55 and 5000 V, respectively. The above procedure was repeated with L-cysteine.

Figure 13. ESI-MS spectrum of the reaction between L-homocysteine and probe **1** (positive ion mode).

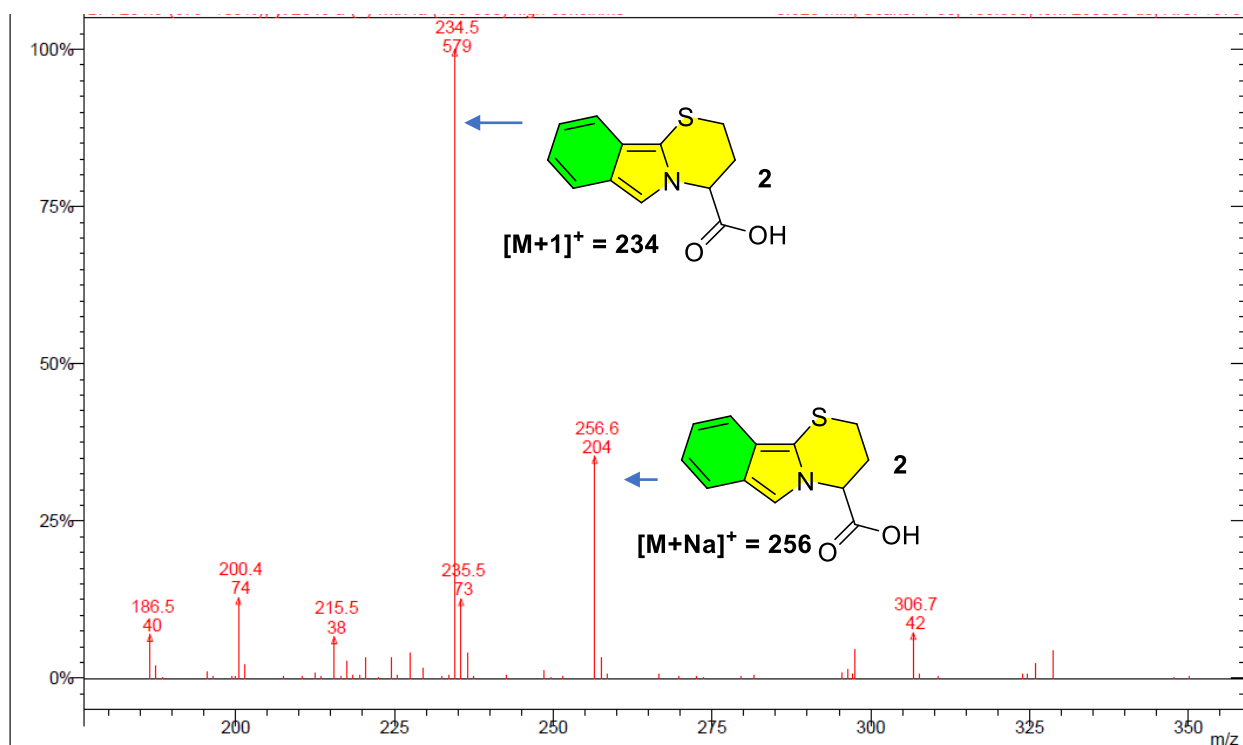

Figure 14. ESI-MS spectrum of the reaction between L-cysteine and probe **1** (positive ion mode).

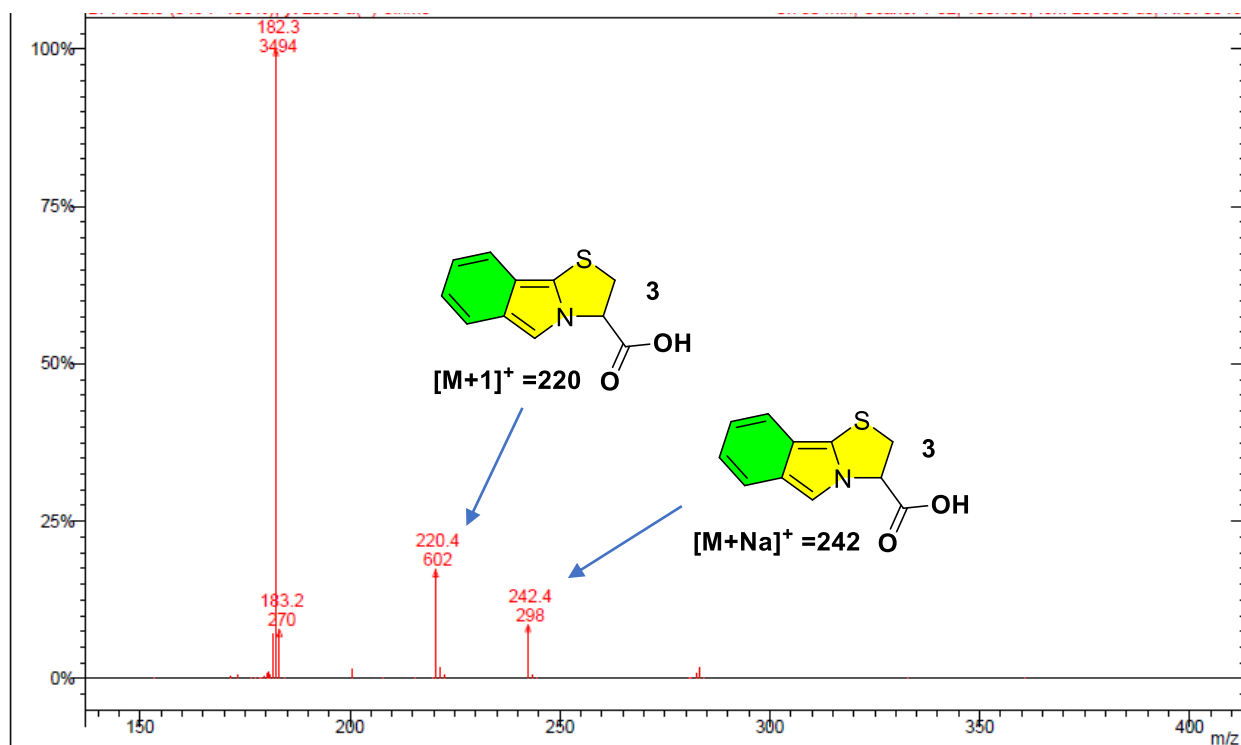

#### 4.4. UV analysis

The reactions of L-homocysteine and L-cysteine with probe **1** was studied using UV spectroscopy. To a solution of **1** (25.0 mM in acetonitrile, 440.0  $\mu\text{L}$ ) was added L-homocysteine (25.0 mM aqueous solution containing 2 equivalents of  $\text{K}_2\text{CO}_3$ , 400.0  $\mu\text{L}$ ) and the mixture was diluted to 2.0 mL with acetonitrile. UV measurements were taken by diluting 40.0  $\mu\text{L}$  aliquots with 2.0 mL of acetonitrile.

Figure 15. UV analysis of the reactions between probe **1** and biothiols.

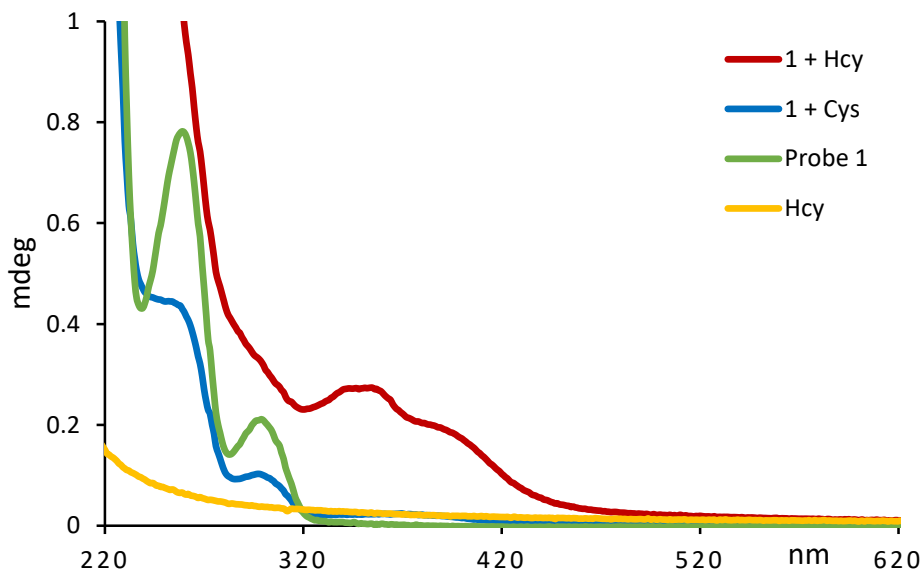

UV measurements were taken at 0.10 mM.

The change in the UV absorbance of probe **1** upon varying concentrations of homocysteine was studied. To a solution of probe **1** (25.0 mM in acetonitrile, 880.0  $\mu\text{L}$ , 10.0 mM) was added homocysteine (25.0 mM aqueous solution containing 2 equivalents of  $\text{K}_2\text{CO}_3$ ) in varying concentrations (0.0, 1.0, 2.0, 3.0, 4.0, 5.0, 6.0, 7.0, 8.0, 9.0 and 10.0 mM) and the mixture was diluted to 2.0 mL with acetonitrile:water (4:1). The reactions were stirred overnight, and UV measurements were taken by diluting 50.0  $\mu\text{L}$  aliquots with 2.0 mL of acetonitrile.

Figure 16. UV analysis of the reactions between probe **1** and increasing concentration of homocysteine

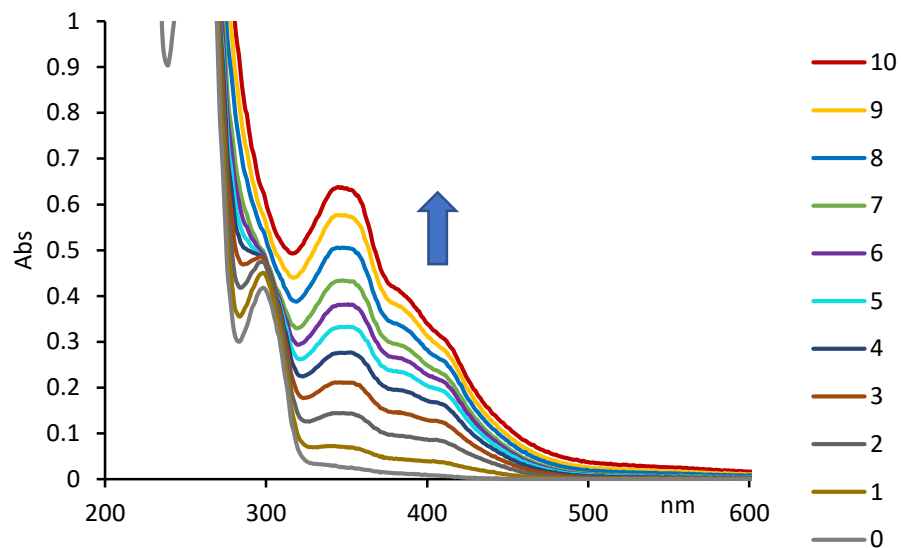

Figure 17. Plot of UV intensity at 351 nm versus the concentration of homocysteine.

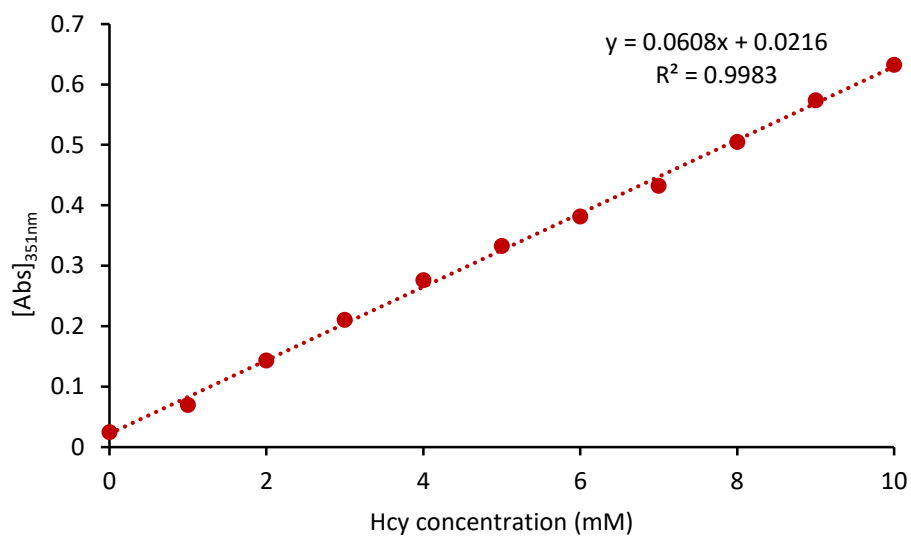

## 5. Quantification of enantiomeric excess of homocysteine in the presence of cysteine

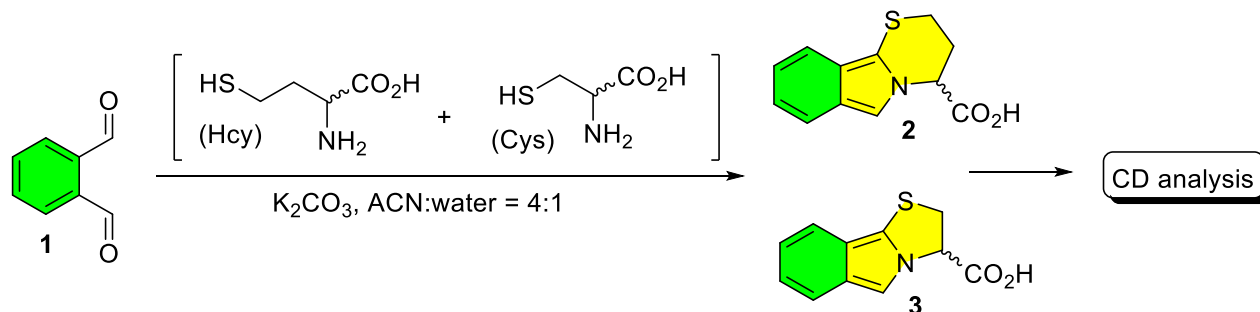

Scheme 2. Quantification of enantiomeric excess of homocysteine in the presence of cysteine using probe **1**.

A calibration curve was constructed using samples containing homocysteine with varying enantiomeric composition. To a solution of probe **1** (25.0 mM in acetonitrile, 880.0  $\mu$ L) was added homocysteine (50.0 mM aqueous solution containing 2 equivalents of  $K_2CO_3$ , 200.0  $\mu$ L) with varying *ee*'s (+100, +90, +80, +70, +60, +50, +40, +30, +20, +10, 0%) and the mixture was diluted with water (200.0  $\mu$ L) and acetonitrile (720.0  $\mu$ L). After 15 minutes, CD measurements were taken by diluting 200.0  $\mu$ L aliquots with 2.0 mL of acetonitrile. The CD amplitudes at 334.0 nm were plotted against the enantiomeric excess of homocysteine.

Figure 18. Chiroptical response of probe **1** to scalemic samples of homocysteine.

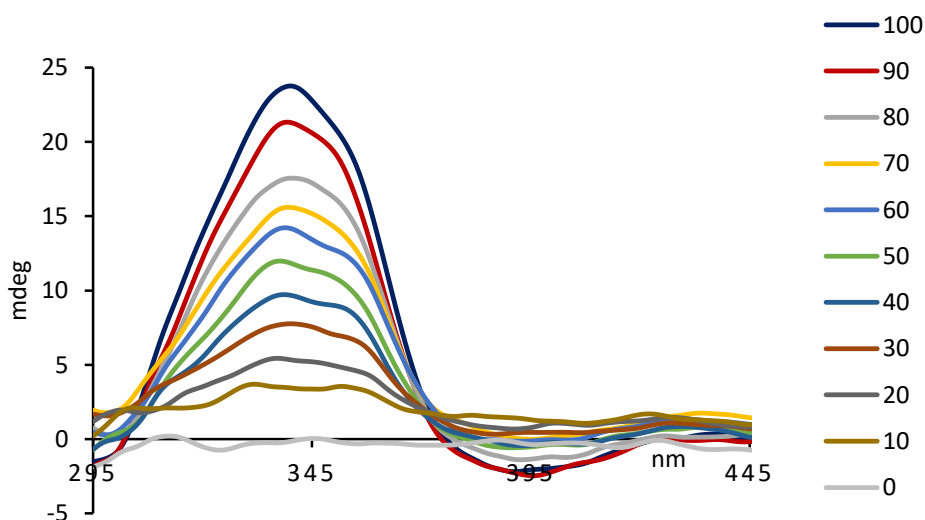

CD measurements were taken at 0.50 mM.

Figure 19. Plot of the CD amplitudes at 334 versus sample *ee*.

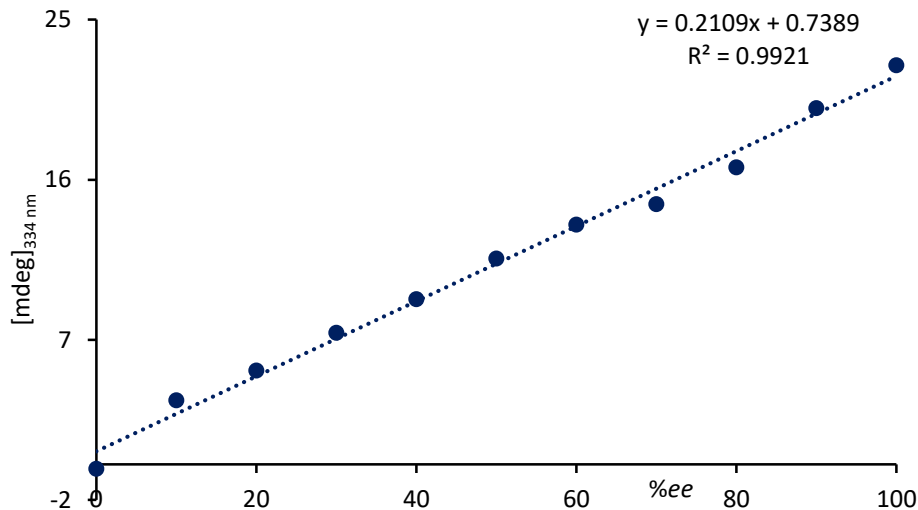

Ten scalemic samples of homocysteine (50.0 mM aqueous solution containing 2 equivalents of  $K_2CO_3$ , 200.0  $\mu L$ ) at varying enantiomeric ratios were prepared in the presence of L-cysteine (50.0 mM aqueous solution containing 2 equivalents of  $K_2CO_3$ , 200.0  $\mu L$ ) and the mixture was added to a solution of probe 1 (25.0 mM in acetonitrile, 880.0  $\mu L$ ) and diluted to 2.0 mL using acetonitrile. After 15 minutes, CD measurements were taken by diluting 200.0  $\mu L$  aliquots with 2.0 mL of acetonitrile. The CD responses at 334 nm were used to determine the %*ee* of homocysteine in the presence of cysteine.

Table 1. Sensing of the %*ee* of L-homocysteine in the presence of cysteine.

| Entry | Sample composition (%) | Sensing results (%) |
|-------|------------------------|---------------------|
| 1     | 95.0                   | 98.8                |
| 2     | 85.0                   | 87.0                |
| 3     | 75.0                   | 79.0                |
| 4     | 65.0                   | 71.5                |
| 5     | 55.0                   | 52.2                |
| 6     | 45.0                   | 42.6                |
| 7     | 35.0                   | 38.3                |
| 8     | 25.0                   | 23.1                |
| 9     | 15.0                   | 18.0                |
| 10    | 5.0                    | 5.2                 |
